# Supplementary material
Source: Springer Nature journal article supplement (https://www.springermedizin.de/resource/supplementary/12876_2011_777_MOESM8_ESM.pdf/9437764)

**5 days**

**8 days**

**A**

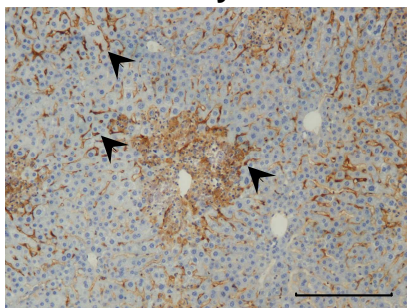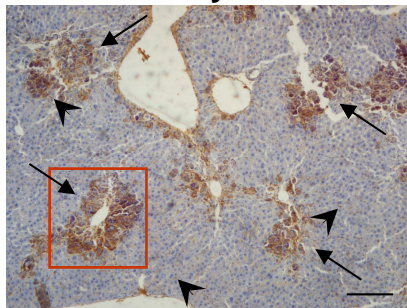

**B**

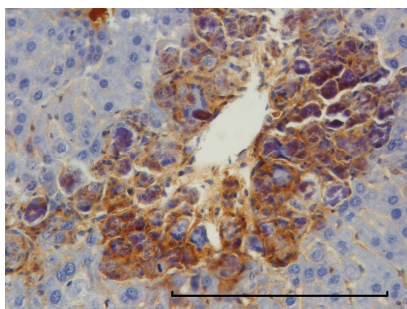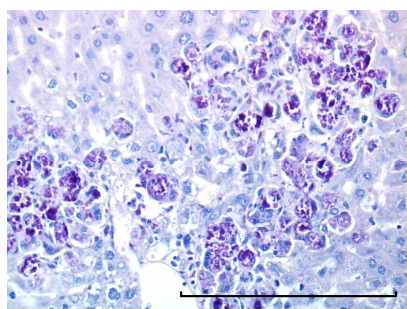

**5 days**

**8 days**

**C**

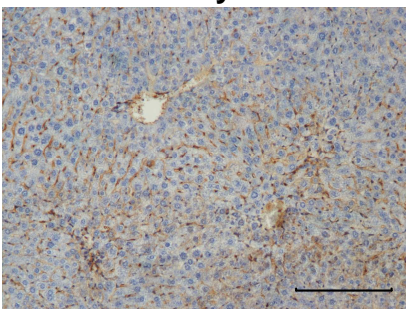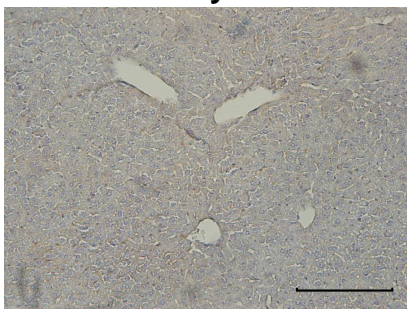

**D**

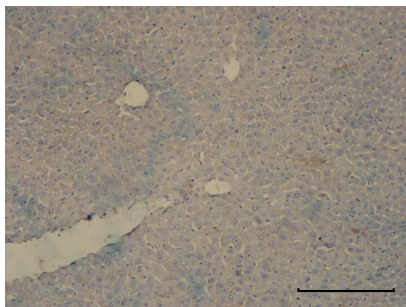

Supplement: MOESM8 [file 9437764]
